# Supplementary material for: Detection of sulfide ion and gaseous H2S using a series of pyridine-2,6-dicarboxamide based scaffolds
Source: Royal Society of Chemistry journal article supplement (doi:10.1039/c8dt01351a), 2018-01-01
Supplement: c8dt01351a1.pdf [file c8dt01351a1.pdf]

## **Electronic Supplementary Information**

For the Manuscript Entitled

### **Detection of sulfide ion and gaseous H<sub>2</sub>S using a series of pyridine-2,6-dicarboxamide based scaffolds**

Pramod Kumar, Vijay Kumar, Saurabh Pandey and Rajeev Gupta\*

Department of Chemistry, University of Delhi, Delhi – 110 007

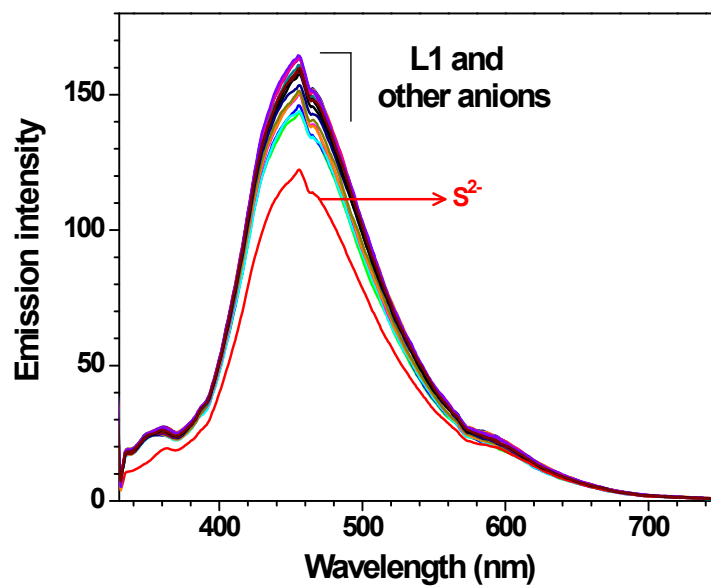

**Figure S1.** Change in emission intensity of chemosensor L1 (10  $\mu\text{M}$ ) in presence of different anions (1mM) in HEPES buffer (10 mM, pH = 7.2) containing 1% DMF.

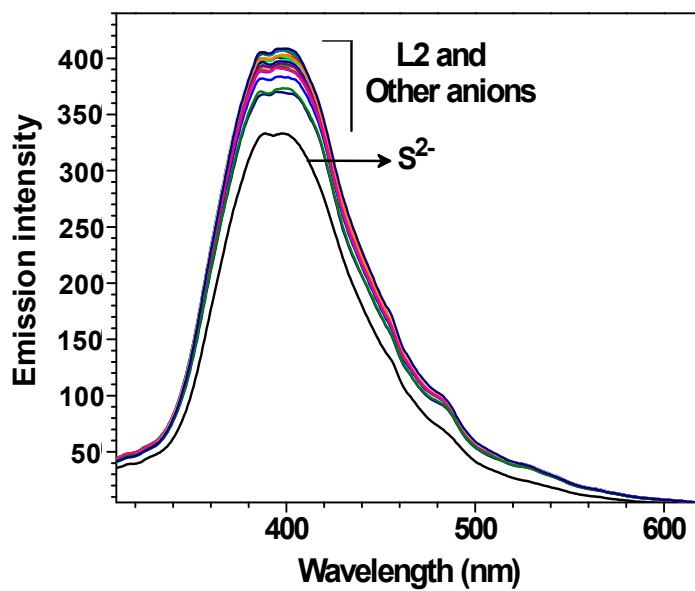

**Figure S2.** Change in emission intensity of chemosensor L2 (10  $\mu\text{M}$ ) in presence of different anions (1mM) in HEPES buffer (10 mM, pH = 7.2) containing 1% DMF.

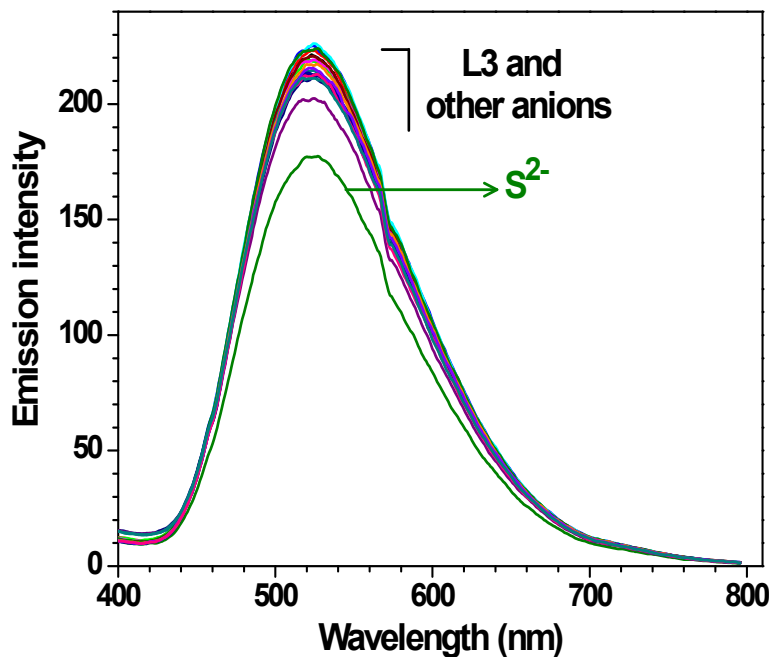

**Figure S3.** Change in emission intensity of chemosensor L3 (10  $\mu\text{M}$ ) in presence of different anions (1mM) in HEPES buffer (10 mM, pH = 7.2) containing 1% DMF.

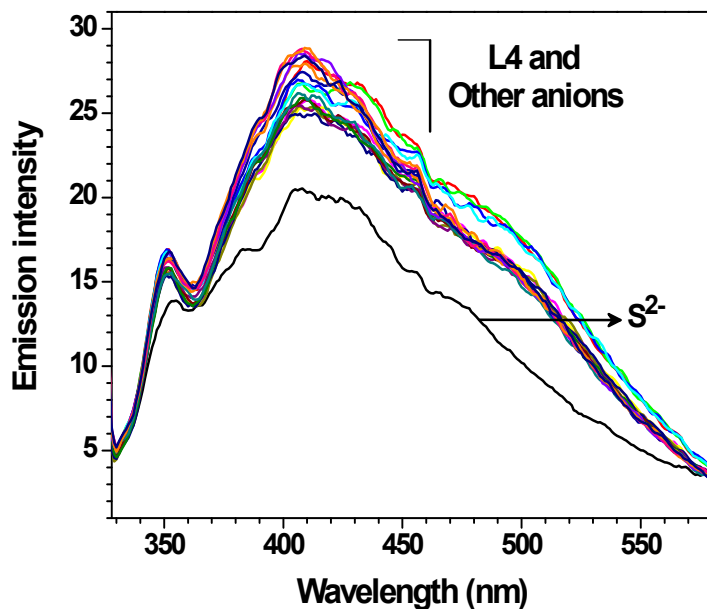

**Figure S4.** Change in emission intensity of chemosensor L4 (10  $\mu\text{M}$ ) in presence of different anions (1mM) in HEPES buffer (10 mM, pH = 7.2) containing 1% DMF.

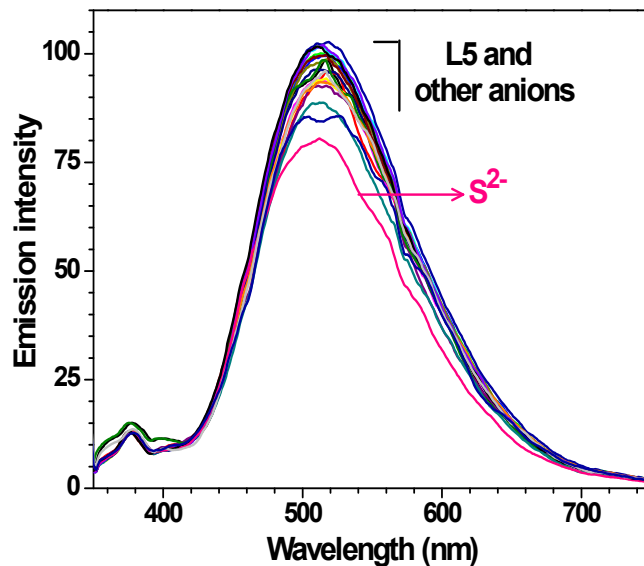

**Figure S5.** Change in emission intensity of chemosensor L5 (10  $\mu\text{M}$ ) in presence of different anions (1mM) in HEPES buffer (10 mM, pH = 7.2) containing 1% DMF.

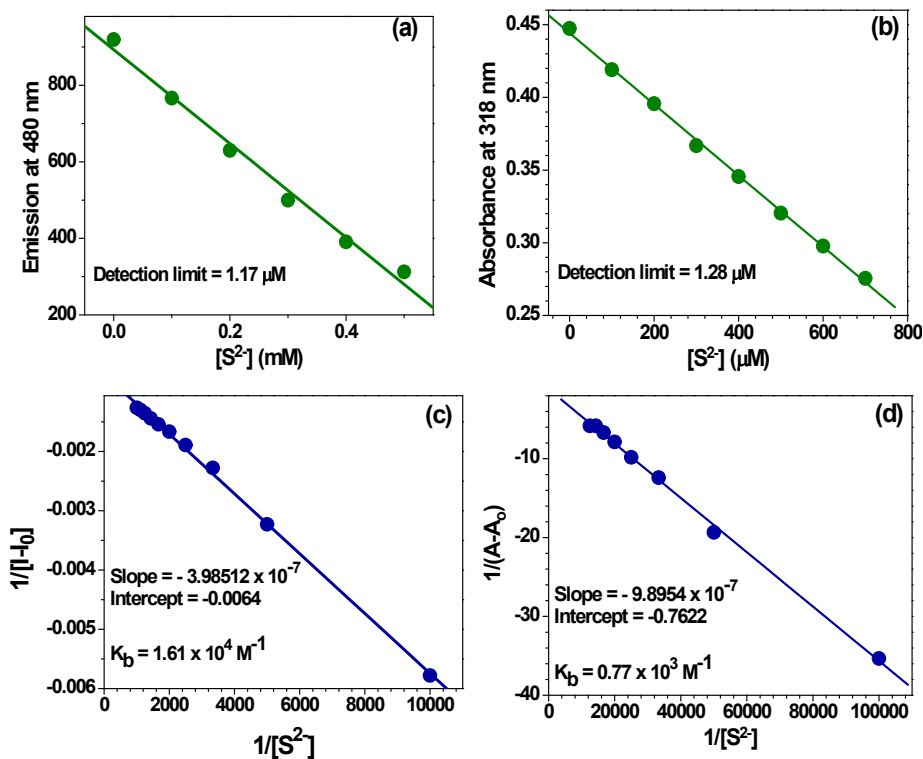

**Figure S6.** Determination of detection limit for  $\text{S}^{2-}$  ion by chemosensor L6 using (a) fluorescence spectral titration and (b) UV-visible spectral titration. Benesi-Hildebrand plots for the detection of  $\text{S}^{2-}$  ion by chemosensor L6 using (c) fluorescence spectral titration and (d) UV-visible spectral titration.

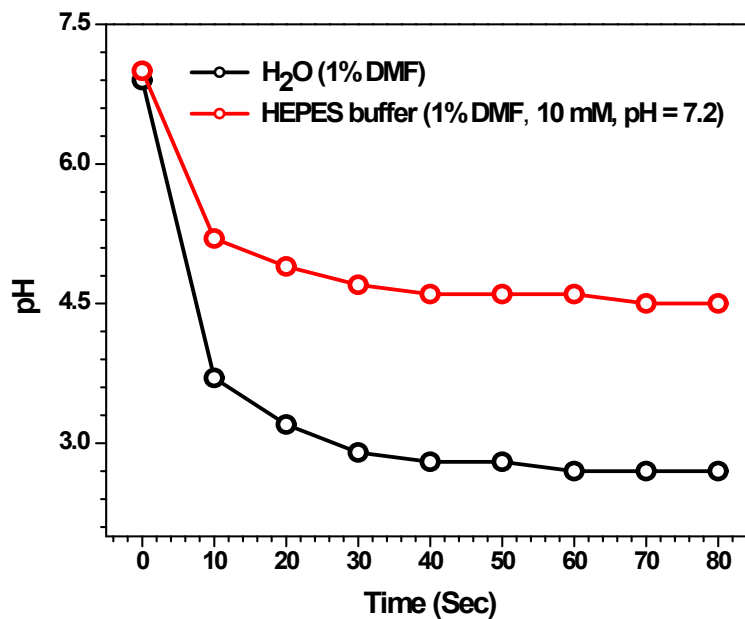

**Figure S7.** Effect of purging H<sub>2</sub>S gas to a solution of chemosensor L6 as a function of time either in water (containing 1% DMF) or in HEPES buffer (1% DMF; 10 mM; pH = 7.2).

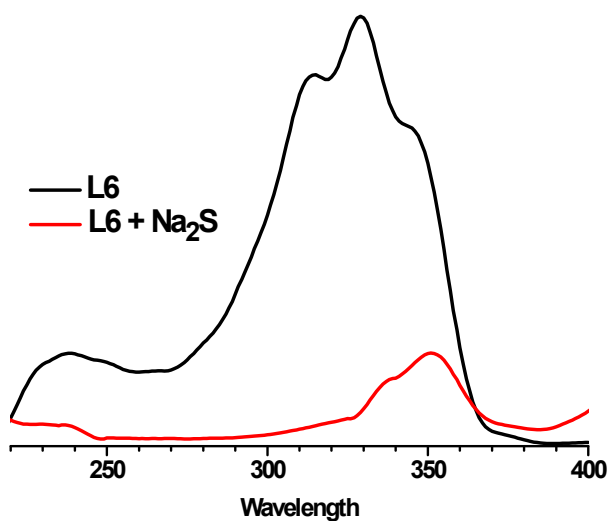

**Figure S8.** Excitation spectra of chemosensor L6 in absence and in presence of Na<sub>2</sub>S in aqueous medium ( $\lambda_{em} = 480$  nm).

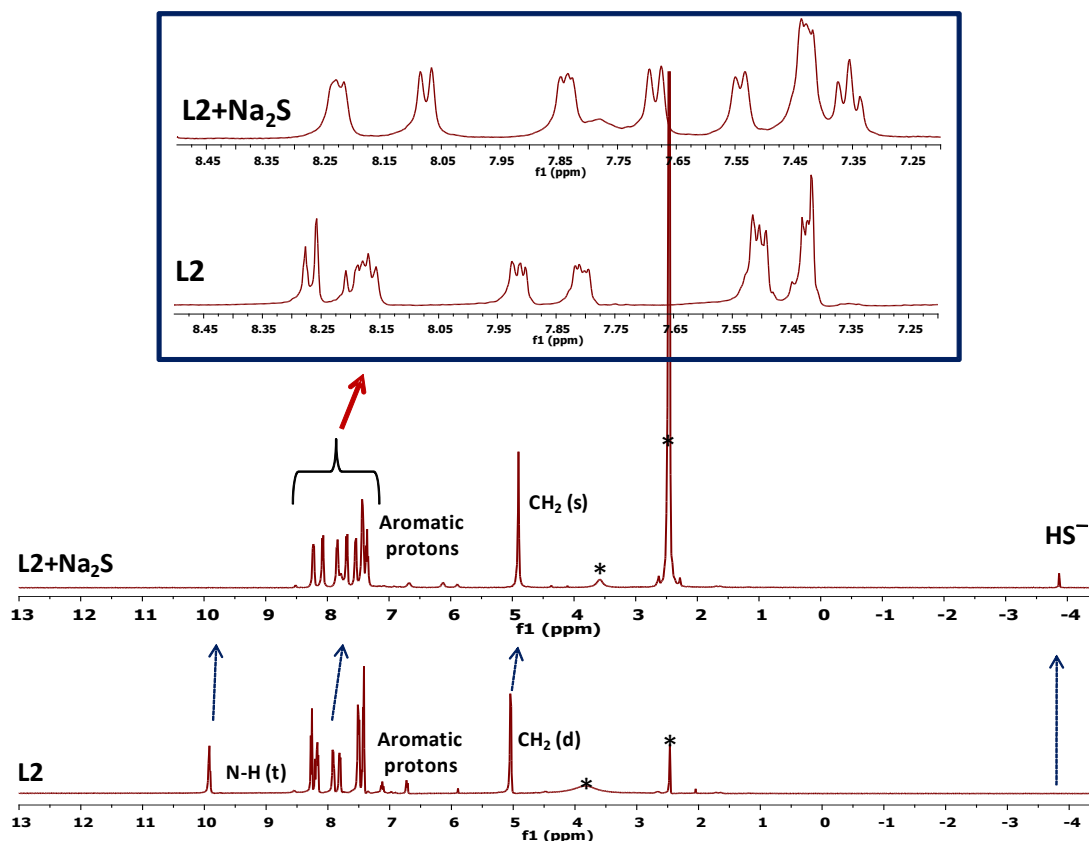

**Figure S9.**  $^1\text{H}$  NMR spectrum of L2 (2.5 mM,  $\text{DMSO-d}_6$ ) in absence and presence of  $\text{Na}_2\text{S}$  (2.0 equiv.). \* represents the residual solvent and/or adventitious water peaks.

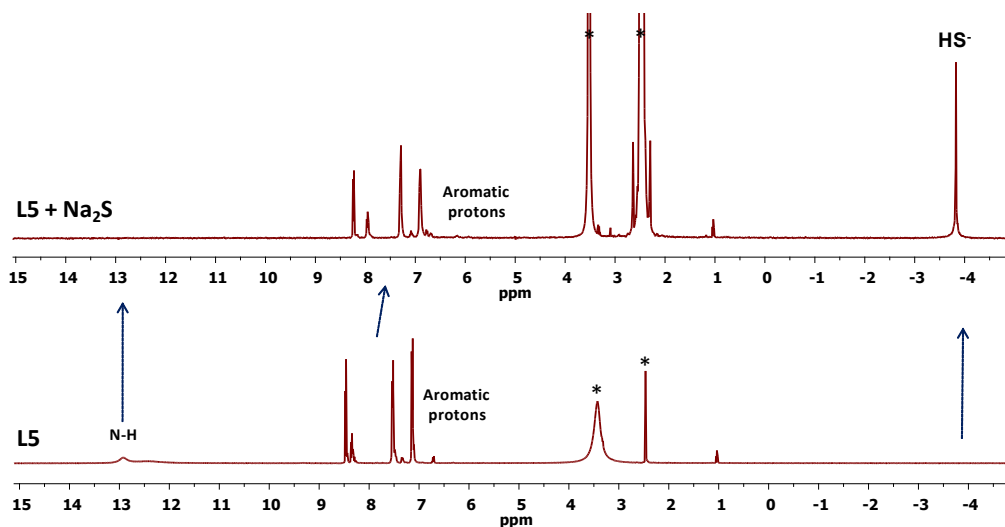

**Figure S10.**  $^1\text{H}$  NMR spectrum of L5 (2.5 mM,  $\text{DMSO-d}_6$ ) in absence and presence of  $\text{Na}_2\text{S}$  (2.0 equiv.). \* represents the residual solvent and/or adventitious water peaks.

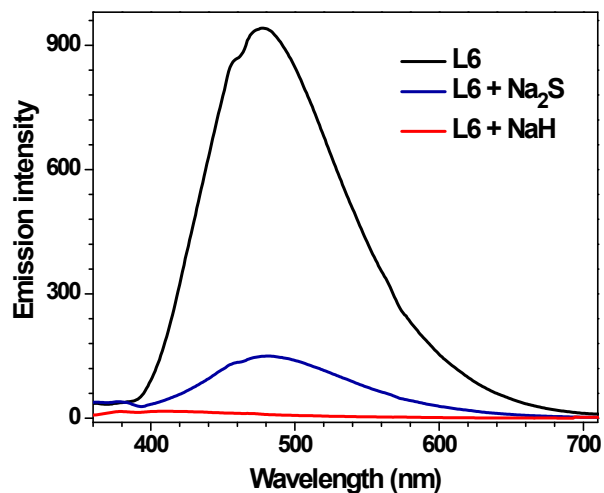

**Figure S11.** Emission spectra of L6 (10  $\mu\text{M}$ ) in absence and in presence of Na<sub>2</sub>S (1 mM) and NaH (2.2 equivalent) in water.

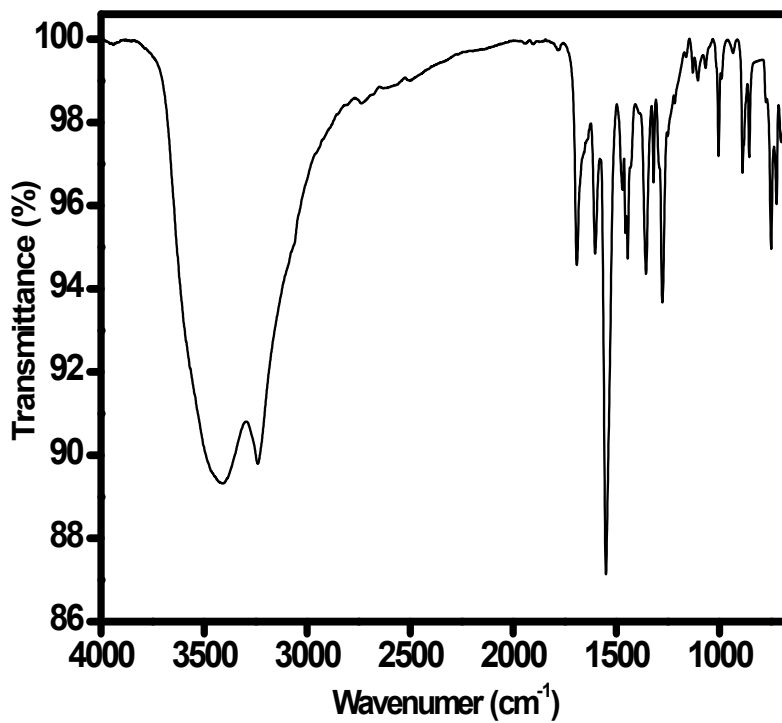

**Figure S12.** FTIR spectrum of chemosensor L7.

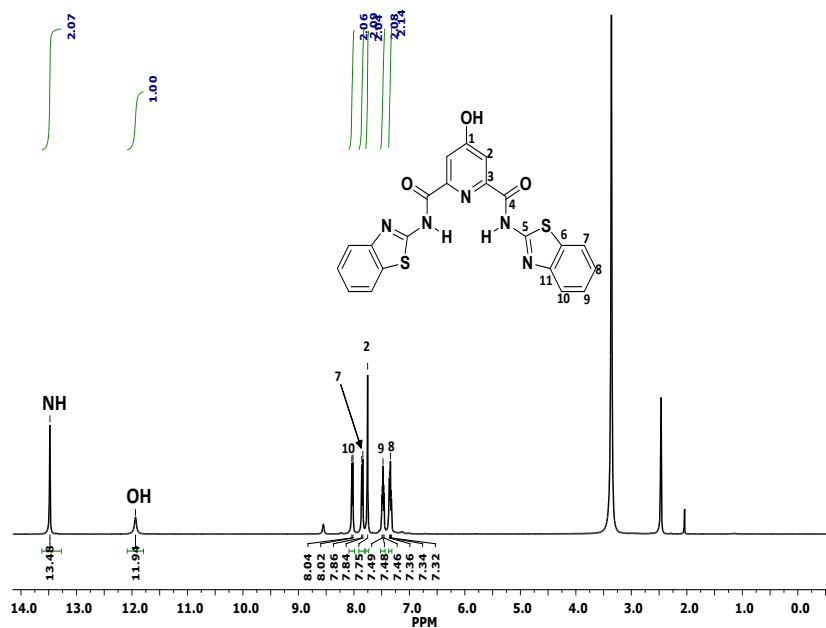

Figure S13.  $^1\text{H}$  NMR spectrum of chemosensor L7 in  $\text{DMSO-d}_6$ .

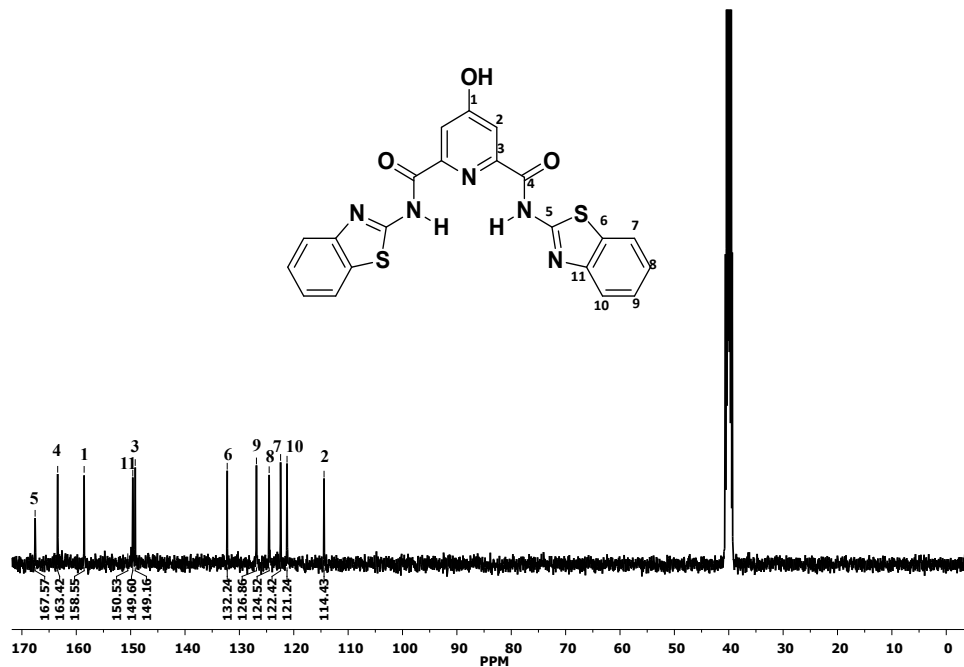

Figure S14.  $^{13}\text{C}$  NMR spectrum of chemosensor L7 in  $\text{DMSO-d}_6$ .



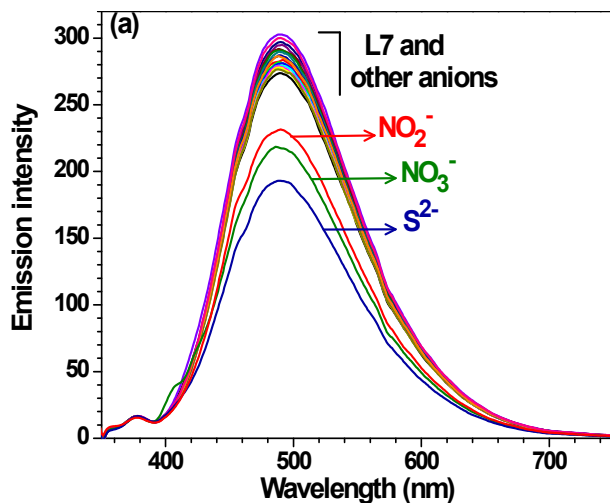

**Figure S15.** Change in the emission intensity of chemosensor L7 (10  $\mu\text{M}$ ) in presence of different anions (1mM) in HEPES buffer (10 mM, pH = 7.2) containing 1% DMF.

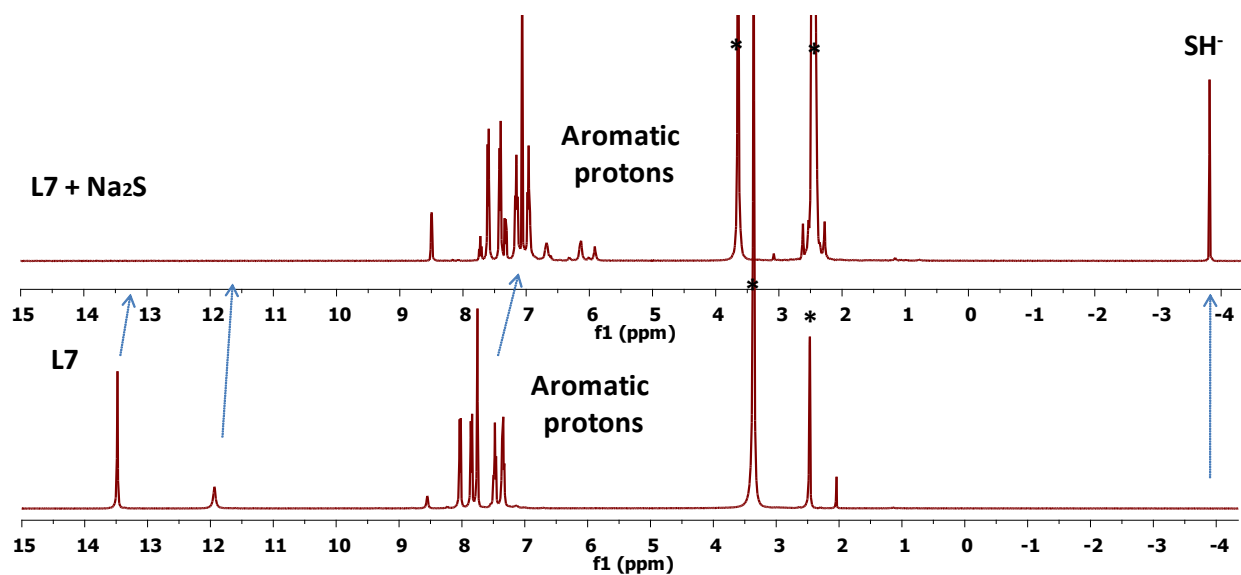

**Figure S16.**  $^1\text{H}$  NMR spectrum of L7 (2.5 mM,  $\text{DMSO-d}_6$ ) in absence and in presence of  $\text{Na}_2\text{S}$  (2.0 equiv.). \* represents the residual solvent and/or adventitious water peaks.

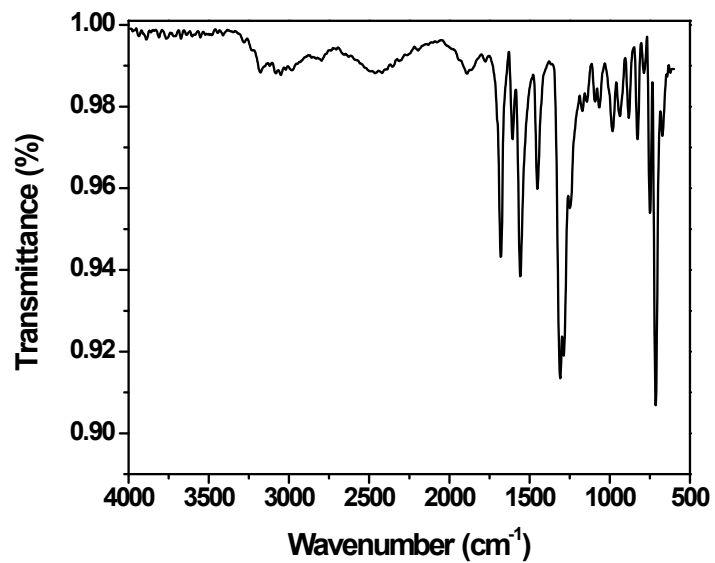

Figure S17. FTIR spectrum of chemosensor L8.

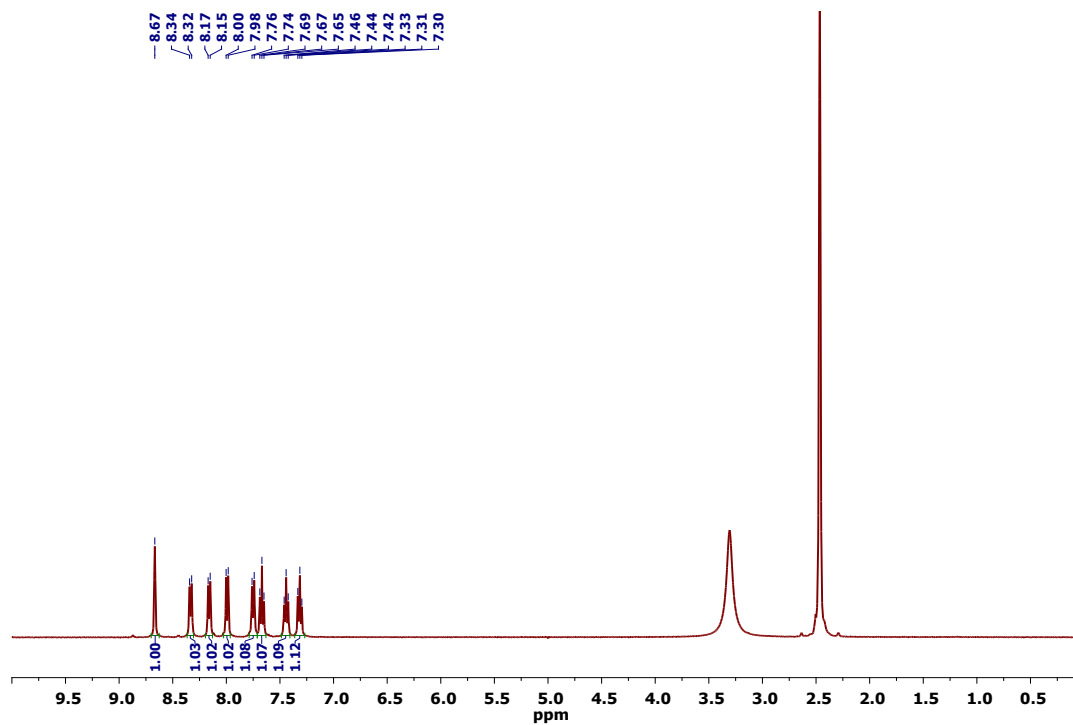

Figure S18. <sup>1</sup>H NMR spectrum of chemosensor L8 in DMSO-d<sub>6</sub>.

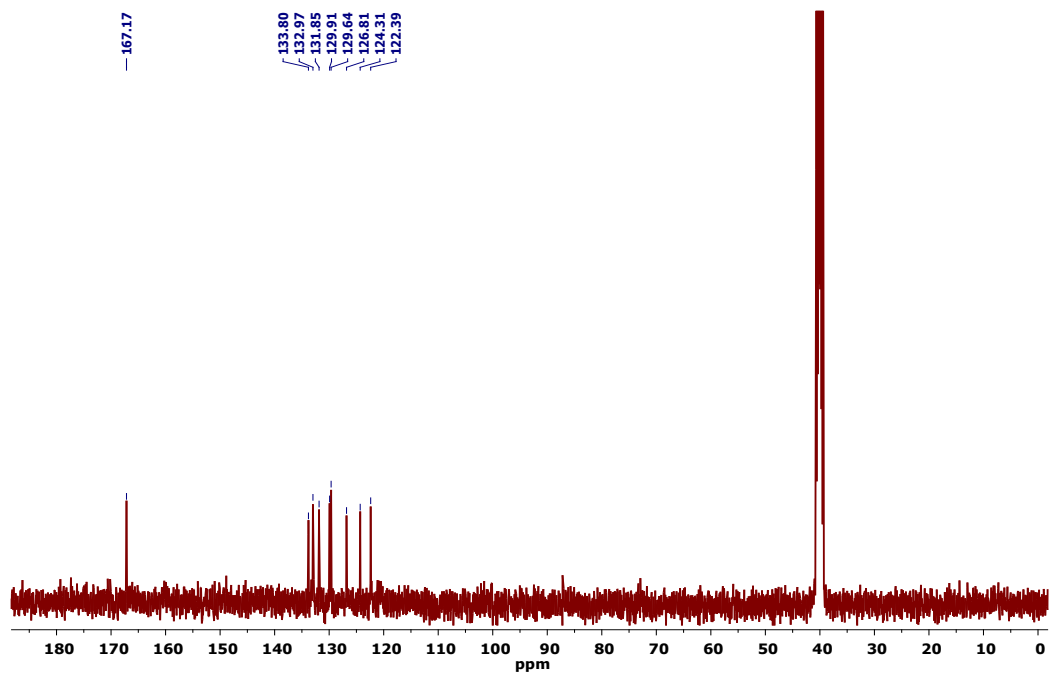

**Figure S19.**  $^{13}\text{C}$  NMR spectrum of chemosensor L8 in  $\text{DMSO-d}_6$ .

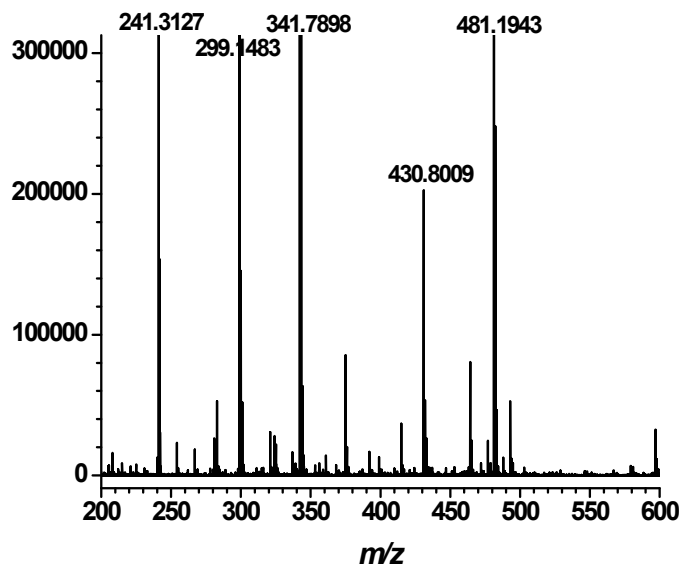

**Figure S20.**  $\text{ESI}^+$  mass spectrum of chemosensor L8 in DMF.

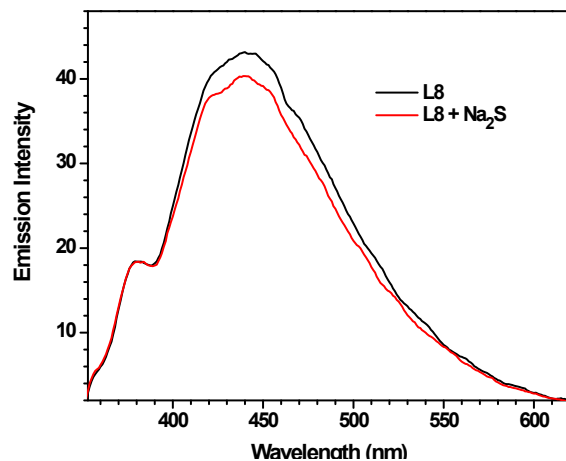

**Figure S21.** Change in the emission intensity of chemosensor L8 (10  $\mu\text{M}$ ) in absence and in presence of  $\text{S}^{2-}$  ion (1mM) in HEPES buffer (10 mM, pH = 7.2) containing 1% DMF.

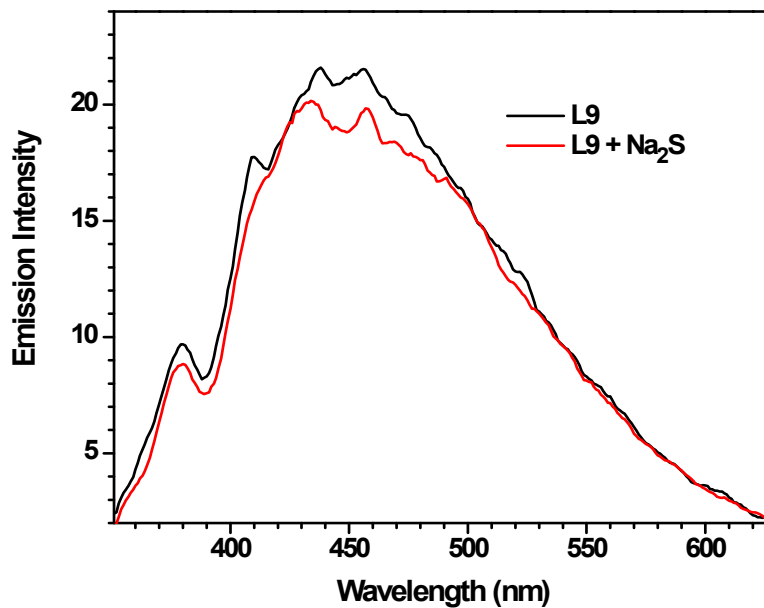

**Figure S22.** Change in the emission intensity of chemosensor L9 (10  $\mu\text{M}$ ) in absence and in presence of  $\text{S}^{2-}$  ion (1mM) in HEPES buffer (10 mM, pH = 7.2) containing 1% DMF.

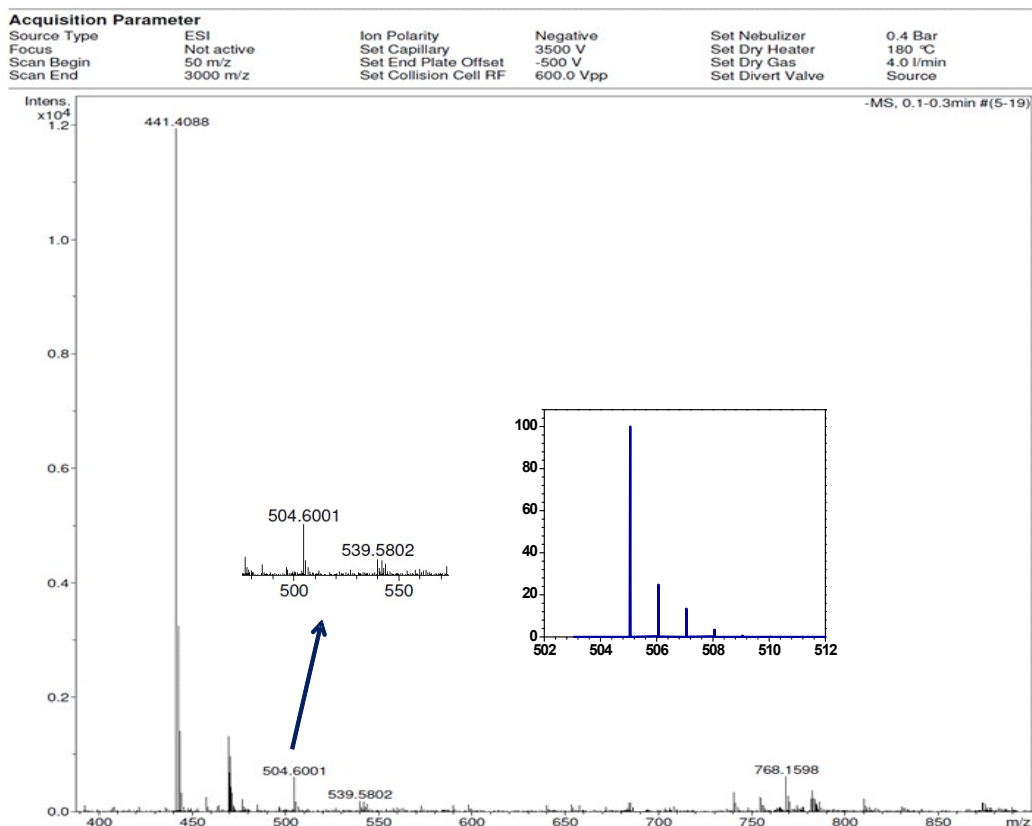

**Figure S23.** Negative mode ESI-MS spectrum of [L6-S] recorded in  $\text{CH}_3\text{CN}$  and its simulated pattern.

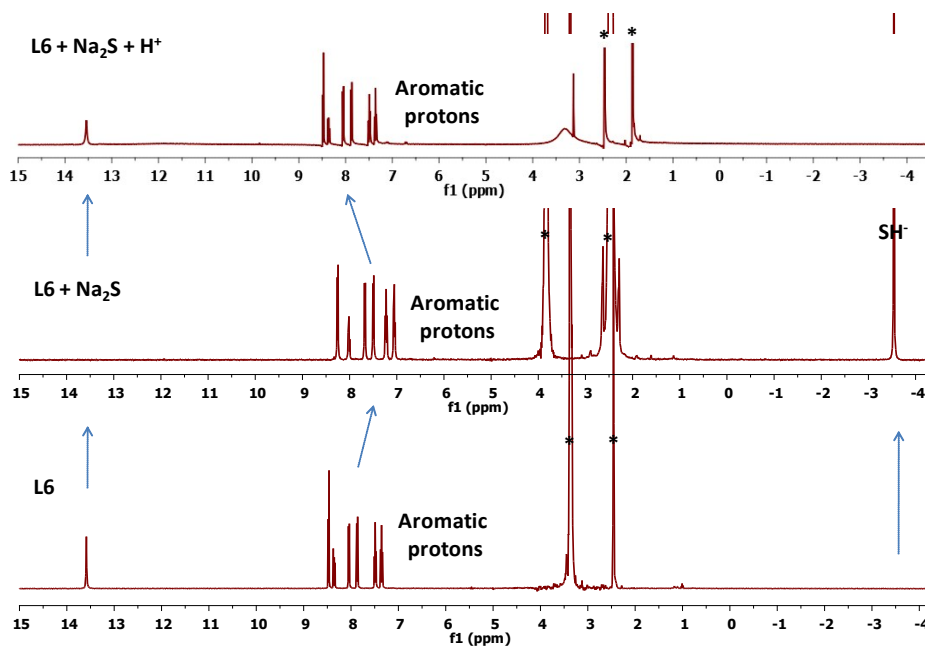

**Figure S24.**  $^1\text{H}$  NMR spectrum of chemosensor L6 (2.5 mM,  $\text{DMSO-d}_6$ ); L6 +  $\text{Na}_2\text{S}$  (2.0 equiv.) and L6 +  $\text{Na}_2\text{S}$  +  $\text{CH}_3\text{COOH}$ . \* represents the residual solvent and water peaks.

**Table S1.** Fluorescence lifetime parameters for chemosensor L6, L6 + Na<sub>2</sub>S and L6 + H<sub>2</sub>S in HEPES buffer (pH = 7.2, 10 mM) ( $\lambda_{\text{ex}} = 280$  nm and  $\lambda_{\text{em}} = 480$  nm).

|                             | $\tau_1$<br>(ns) | $\tau_2$<br>(ns) | $\tau_3$<br>(ns) | $B_1$   | $B_2$   | $B_3$   | A       | Average<br>Lifetime<br>$\tau_{\text{av}}$ (ns) |
|-----------------------------|------------------|------------------|------------------|---------|---------|---------|---------|------------------------------------------------|
| <b>L6</b>                   | 3.9023           | 0.9061           | 12.9051          | 0.03786 | 0.05351 | 0.01201 | 3.8088  | 7.43                                           |
| <b>L6 + Na<sub>2</sub>S</b> | 3.1609           | 0.6943           | 16.1626          | 0.01657 | 0.11595 | 0.00256 | 1.34347 | 5.12                                           |
| <b>L6 + H<sub>2</sub>S</b>  | 3.1429           | 0.5158           | 14.6731          | 0.01701 | 0.13946 | 0.00289 | 3.21791 | 4.94                                           |

**Table S2.** Crystallographic data collection and structure solution parameters for L6·DMF.

|                                                           |                                                                              |
|-----------------------------------------------------------|------------------------------------------------------------------------------|
| Formula                                                   | C <sub>24</sub> H <sub>20</sub> N <sub>6</sub> O <sub>3</sub> S <sub>2</sub> |
| Fw                                                        | 504.58                                                                       |
| T(K)                                                      | 298(2)                                                                       |
| Crystal System                                            | monoclinic                                                                   |
| Space Group                                               | <i>C2/c</i>                                                                  |
| <i>a</i> (Å)                                              | 21.6495(7)                                                                   |
| <i>b</i> (Å)                                              | 7.3556(3)                                                                    |
| <i>c</i> (Å)                                              | 30.0659(9)                                                                   |
| $\alpha$ (°)                                              | 90                                                                           |
| $\beta$ (°)                                               | 103.501(3)                                                                   |
| $\gamma$ (°)                                              | 90                                                                           |
| <i>V</i> (Å <sup>3</sup> )                                | 4655.5(3)                                                                    |
| <i>Z</i>                                                  | 8                                                                            |
| <i>d</i> (Mg/m <sup>3</sup> )                             | 1.440                                                                        |
| <i>F</i> (000)                                            | 2096                                                                         |
| Goodness-of-fit on <i>F</i> <sup>2</sup>                  | 1.068                                                                        |
| <i>R</i> <sub>1</sub> , <i>wR</i> <sub>2</sub> [I > 2(I)] | 0.0433, 0.1032                                                               |
| <i>R</i> <sub>1</sub> , <i>wR</i> <sub>2</sub> [all data] | 0.0537, 0.1093                                                               |
| CCDC No.                                                  | 1835393                                                                      |
